# Supplementary material for: Percolation on feature-enriched interconnected systems
Source: PubMed Central journal article supplement (PMC8087700; doi:10.1038/s41467-021-22721-z), 2021-04-30
Supplement: 41467_2021_22721_MOESM3_ESM.pdf [file 41467_2021_22721_MOESM3_ESM.pdf]

## Description of Additional Supplementary Files

**Supplementary Movie 1:** Curve collapsing with critical exponent  $\beta = 5$  and varying  $\overline{\nu}_{\alpha}$  for the positively correlated case close to  $\alpha = 1$ . See Supplementary Note 6 for further details.

**Supplementary Movie 2:** Curve collapsing with critical exponent  $\beta = 16$  and varying  $\overline{\nu}_{\alpha}$  for the positively correlated case close to  $\alpha = 1$ . See Supplementary Note 6 for further details.
